# Supplementary material
Source: Springer Nature journal article supplement (https://www.springermedizin.de/resource/supplementary/13722_2012_135_MOESM2_ESM.pdf/9675094)
Supplement: MOESM2 [file 9675094]

| Question                                                                                            | Yes | No |
|-----------------------------------------------------------------------------------------------------|-----|----|
| The doctor asked me if I planned a pregnancy or used contraception.                                 |     |    |
| The doctor asked me about my alcohol consumption.                                                   |     |    |
| The doctor told me about the incompatibility of pregnancy and alcohol use.                          |     |    |
| The doctor provided information about negative effects of alcohol on the fetus and child's health.  |     |    |
| The doctor advised me to make a choice: either stop/reduce drinking or use effective contraception. |     |    |
| The doctor asked me what I would choose.                                                            |     |    |
| The doctor helped me to make my choice (stop/reduce drinking or use effective contraception).       |     |    |
| The doctor talked to me how to achieve the goal.                                                    |     |    |
| The doctor discussed with me barriers I might face.                                                 |     |    |
| The doctor made a follow-up appointment                                                             |     |    |
| I felt the doctor's support and willingness to help me.                                             |     |    |
